# Supplementary material for: Student Nurses Undertaking Acute Hospital Paid Placements during COVID-19: Rationale for Opting-In? A Qualitative Inquiry
Source: MDPI journal article supplement (doi:10.3390/healthcare9081001), 2021-08-05
Supplement: s1 [file s1]

Supplementary Table S1: Health and care educational institutions and organisations response to COVID-19 undergraduate nursing programmes.

| <i>Year</i>                     | <i>Author/<br/>Location</i>        | <i>Article<br/>type</i>                    | <i>Title</i>                                                                                                                                                      | <i>Summary Key COVID-19 themes</i>                                                                                                                                                                                                                                                                                                                                                                                                                                                                                                                                                                                                                                                                                                                                                             |
|---------------------------------|------------------------------------|--------------------------------------------|-------------------------------------------------------------------------------------------------------------------------------------------------------------------|------------------------------------------------------------------------------------------------------------------------------------------------------------------------------------------------------------------------------------------------------------------------------------------------------------------------------------------------------------------------------------------------------------------------------------------------------------------------------------------------------------------------------------------------------------------------------------------------------------------------------------------------------------------------------------------------------------------------------------------------------------------------------------------------|
| <b>Relevant research papers</b> |                                    |                                            |                                                                                                                                                                   |                                                                                                                                                                                                                                                                                                                                                                                                                                                                                                                                                                                                                                                                                                                                                                                                |
| 2020                            | Jackman et al,<br>Canada           | Qualitative<br>Research                    | Crisis and continuity: Rural health care students respond to the COVID-19 outbreak                                                                                | For students placed in rural areas, already coping with isolation, precarious supply chains and shortages of essential personnel, the effects of the COVID-19 outbreak may have far-reaching implications for psychosocial wellness, self-efficacy and clinical judgment. Four nursing and eight medical students (n = 12) supplied photographs and commentary documenting the experience of withdrawing suddenly from clinical sites. Collaborative, thematic analysis revealed continuities between pre- and post-outbreak life, both for the students and their rural hosts. Social determinants of health such as seclusion, environmental hazards, and health-seeking behaviours carried over and compounded the effects of the outbreak on the placement communities and clinical sites. |
| 2020                            | Jimenez-Rodriguez et al.,<br>Spain | Mixed methods research                     | Simulated Nursing Video Consultations: An Innovative Proposal During COVID-19 Confinement                                                                         | In response to the COVID-19 pandemic the research focused on finding a solution for adapting simulation-based education to support student nurses while working off campus. A mixed methodology was applied to analyse nursing students' satisfaction and perceptions for engaging with simulated nursing video consultations. Nursing students expressed good satisfaction and perceptions about using video consultations. Simulated nursing video consultations could be considered as another choice of high-fidelity simulation.                                                                                                                                                                                                                                                          |
| 2020                            | Leigh et al.,<br>UK                | Qualitative Report                         | A guide to the NMC emergency standards for nurse education during the current deployment of student nurses                                                        | Provides an exemplar of how a UK University with NHS providers have devised a framework to ensure safe implementation and compliance with the NMC new emergency standards.                                                                                                                                                                                                                                                                                                                                                                                                                                                                                                                                                                                                                     |
| 2020                            | Leigh et al.,<br>UK                | Qualitative Research<br>Student experience | Student experiences of nursing on the front line during the COVID-19 pandemic                                                                                     | The article provides reflection's from University students of working on the front line during the pandemic. The challenges and opportunities are explored in detail surrounding the decision to opt in or out of the paid placement.                                                                                                                                                                                                                                                                                                                                                                                                                                                                                                                                                          |
| 2020                            | Ramos-Morcillo                     | Qualitative research                       | Experiences of Nursing Students during the Abrupt Change from Face-to-Face to e-Learning Education during the First Month of Confinement Due to COVID-19 in Spain | The qualitative research aimed to discover the learning experiences and the expectations arising from the challenges of COVID-19 pandemic where face-to-face changes to e-learning and online nurse education. Semie structured interview were undertaken with 32 students. Six key themes emerged from the findings as follows:(1) practicing care; (2) uncertainty; (3) time;                                                                                                                                                                                                                                                                                                                                                                                                                |

| <i>Year</i>                    | <i>Author/<br/>Location</i>                                                               | <i>Article<br/>type</i> | <i>Title</i>                                                                                                                                  | <i>Summary Key COVID-19 themes</i>                                                                                                                                                                                                                                                                                                                                                                                    |
|--------------------------------|-------------------------------------------------------------------------------------------|-------------------------|-----------------------------------------------------------------------------------------------------------------------------------------------|-----------------------------------------------------------------------------------------------------------------------------------------------------------------------------------------------------------------------------------------------------------------------------------------------------------------------------------------------------------------------------------------------------------------------|
|                                |                                                                                           |                         |                                                                                                                                               | (4) teaching methodologies; (5) context of confinement and added difficulties; (6) face-to-face win.                                                                                                                                                                                                                                                                                                                  |
| <b>Relevant opinion pieces</b> |                                                                                           |                         |                                                                                                                                               |                                                                                                                                                                                                                                                                                                                                                                                                                       |
| 2020                           | Angue and Long<br>USA                                                                     | Story                   | From a Nurse's Eyes as a COVID Patient                                                                                                        | Staff/Patient experience Shared the experience of being a patient with COVID-19 during the pandemic and the learning from being a patient to influence nursing                                                                                                                                                                                                                                                        |
| 2020                           | Carolan et al.,<br>2020<br>United Kingdom (UK), United States of America (USA), Australia | Guest Editorial         | COVID-19: Disruptive impacts and transformative opportunities in undergraduate nurse education                                                | International response and action required by Higher Education Institutions delivering Undergraduate Pre-Registration nursing Move towards online and distance learning. Highlights the challenges and opportunities of the rapid move towards online provision.                                                                                                                                                      |
| 2020                           | Beltz et al.<br>USA                                                                       | Statement               | Innovations in Nursing Education: Recommendations in Response to the COVID-19 Pandemic                                                        | Request to relevant professional and government regulators for nursing students to complete clinical competences by simulation.                                                                                                                                                                                                                                                                                       |
| 2020                           | Courtney et al.,<br>UK, South Africa, Brazil, Australia, USA                              | Commentary              | Preparing nurses for COVID-19 response efforts through involvement in antimicrobial stewardship programmes                                    | Detail the importance of nurses indeed all healthcare workers having the knowledge, understanding and skills to differentiate between viral and bacterial pneumonia, To question the use for viral infection, or when microbiology results do not indicate a bacterial cause. Developing sound competencies in antimicrobial stewardship (AMS) is essential for future treatment and management of COVID-19 patients. |
| 2020                           | Hayter and Jackson                                                                        | Editorial               | Pre-registration undergraduate nurses and the COVID-19 pandemic: Students or workers?                                                         | Exploration of the utilization of student nurses joining the workforce during the pandemic.                                                                                                                                                                                                                                                                                                                           |
| 2020                           | Huang et al.,<br>China                                                                    | Guidance                | Guidance on Flexible Learning during Campus Closures: Ensuring course quality of higher education in COVID-19 outbreak Rights and Permissions | Provide guidance for university teachers and how to tackle the challenges when moving from face-to-face teaching and learning to online and distance learning.                                                                                                                                                                                                                                                        |
| 2020                           | Missouri State Board of Nursing<br>USA                                                    | Bulletin                | COVID-19 Brief                                                                                                                                | An information bulletin highlighting important decisions and measures taken by Governors and the Board of Nursing in response to increase the workforce.                                                                                                                                                                                                                                                              |
