# Supplementary figures and images for: Student Nurses Undertaking Acute Hospital Paid Placements during COVID-19: Rationale for Opting-In? A Qualitative Inquiry
Source: MDPI journal article supplement (doi:10.3390/healthcare9081001), 2021-08-05

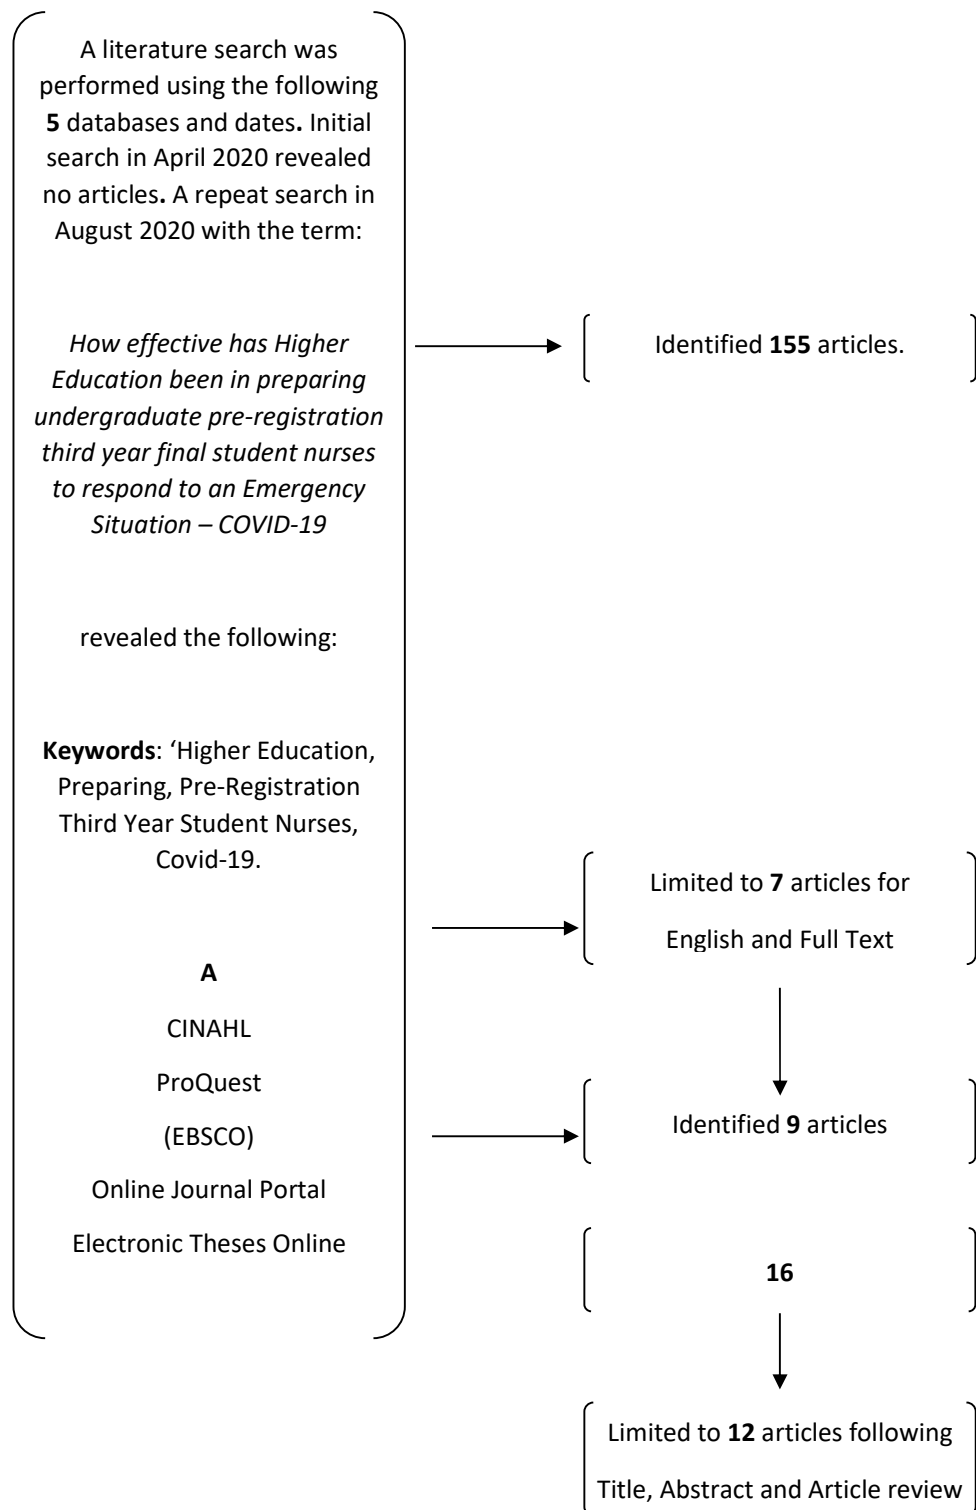

Supplementary Figure S1: Search Strategy.

Supplement: s1 [file s1]
